# Supplementary material for: Contribution of Nontraditional Lipid Profiles to Hyperuricemia in Rural Chinese Hypertensive Population: Findings From the China Hypertension Registry Study
Source: Research Square preprint supplement (doi:10.21203/rs.3.rs-101773/v1), 2020-11-05
Supplement: Supplementary file 1 [file c4cb8c41fa18a71bc9d2bfb8.docx]

| Table S1. The study inclusion and exclusion criteria |
| --- |
| Inclusion criteria |
| 1. 18 years of age or older |
| 1. hypertension defined as office systolic blood pressure (SBP) values ≥140 mmHg and/or diastolic BP (DBP) values ≥90 mmHg, self-reported history of hypertension, or the use of antihypertensive drug(s) at baseline |
| 1. signed informed consent |
| Exclusion criteria |
| 1. psychological or nervous system impairment resulting in an inability to demonstrate informed consent |
| 1. unable to be followed up according to the study protocol, or plans to relocate in the near future |
| 1. patients who were not suitable for inclusion or for long-term follow-up as assessed by the study physicians |
